# Supplementary material for: Modulation of heart rate responses to acute stressors throughout the breeding season in a colonial seabird, the king penguin
Source: Oxford University Press journal article supplement (doi:10.1242/jeb.112003), 2015-01-01
Supplement: jeb112003supp.pdf [file jeb112003supp.pdf]

**Table S1. Model selection based on Akaike's Information Criterion corrected for small sample sizes (AICc) to explain heart rate excess variability in response to acute stressors in breeding king penguin.**

| N° | Model terms                                                                                                  | Covariates                  | df       | Loglikelihood<br>d | AICc         | ΔAICc       | wi           |
|----|--------------------------------------------------------------------------------------------------------------|-----------------------------|----------|--------------------|--------------|-------------|--------------|
| 1  | <b>Breeding shift + Stressor type</b>                                                                        | Colony area, stressor order | <b>8</b> | <b>-476.825</b>    | <b>970.3</b> | <b>0.00</b> | <b>0.496</b> |
| 2  | Breeding shift + Stressor type + Sex                                                                         | Colony area, stressor order | 9        | -476.818           | 972.4        | 2.14        | 0.170        |
| 3  | Breeding shift + Stressor type + Breeding shift*Stressor type                                                | Colony area, stressor order | 10       | -476.259           | 973.5        | 3.20        | 0.100        |
| 4  | Breeding shift + Stressor type + Sex + Sex*Stressor type                                                     | Colony area, stressor order | 11       | -475.350           | 973.8        | 3.57        | 0.083        |
| 5  | Breeding shift + Stressor type + Sex + Sex*Breeding shift                                                    | Colony area, stressor order | 10       | -476.814           | 974.6        | 4.31        | 0.058        |
| 6  | Breeding shift + Stressor type + Sex + Breeding shift*Stressor type                                          | Colony area, stressor order | 11       | -476.258           | 975.6        | 5.39        | 0.034        |
| 7  | Breeding shift + Stressor type + Sex + Sex*Breeding shift + Sex*Stressor type                                | Colony area, stressor order | 12       | -475.341           | 976.0        | 5.76        | 0.028        |
| 8  | Breeding shift + Stressor type + Sex + Sex*Stressor type + Breeding shift*Stressor type                      | Colony area, stressor order | 13       | -474.911           | 977.4        | 7.13        | 0.014        |
| 9  | Breeding shift + Stressor type + Sex + Sex*Breeding shift + Breeding shift*Stressor type                     | Colony area, stressor order | 12       | -476.252           | 977.8        | 7.59        | 0.011        |
| 10 | Breeding shift + Stressor type + Sex + Sex*Breeding shift + Sex*Stressor type + Breeding shift*Stressor type | Colony area, stressor order | 14       | -473.902           | 980.4        | 9.35        | 0.005        |

The 10 best models retained by AICc selection are presented. Independent variables include stressor type (sounds, 10-m approaches and captures), breeding shift number, sex, and interactions between those variables. Colony area and stressor order were entered as a covariates in all models to control for area related differences in stress responses (see Viblanc et al. 2012) and potential habituation/sensitization effects. Bird ID was included as a random factor in all models to account for repeated measures on individual birds. ΔAICc is the difference in AIC compared to the best model (given in bold). The AIC weight is given by wi and represents the probability that a given model is the best among the models presented. When 2 models had ΔAICc < 2, the model with the highest wi was selected.

**Table S2. Model selection based on Akaike's Information Criterion corrected for small sample sizes (AICc) to explain heart rate excess variability in response to acute stressors in breeding king penguin**

| N° | Model terms                                                                                                   | Covariates                  | df       | Loglikelihood<br>d | AICc         | ΔAICc       | wi           |
|----|---------------------------------------------------------------------------------------------------------------|-----------------------------|----------|--------------------|--------------|-------------|--------------|
| 1  | <b>Breeding stage + Stressor type</b>                                                                         | Colony area, stressor order | <b>8</b> | <b>-472.566</b>    | <b>961.7</b> | <b>0.00</b> | <b>0.292</b> |
| 2  | Breeding stage + Stressor type + Breeding stage*Stressor type                                                 | Colony area, stressor order | 10       | -470.464           | 961.9        | 0.13        | 0.274        |
| 3  | Breeding stage + Stressor type + Sex                                                                          | Colony area, stressor order | 9        | -472.313           | 963.4        | 1.65        | 0.128        |
| 4  | Breeding stage + Stressor type + Sex + Breeding stage*Stressor type                                           | Colony area, stressor order | 11       | -470.328           | 963.8        | 2.05        | 0.105        |
| 5  | Breeding stage + Stressor type + Sex + Sex*Stressor type                                                      | Colony area, stressor order | 11       | -470.884           | 964.9        | 3.16        | 0.060        |
| 6  | Breeding stage + Stressor type + Sex + Sex *Breeding stage                                                    | Colony area, stressor order | 10       | -472.280           | 965.5        | 3.76        | 0.045        |
| 7  | Breeding stage + Stressor type + Sex + Sex*Breeding stage + Breeding stage *Stressor type                     | Colony area, stressor order | 12       | -470.299           | 965.9        | 4.20        | 0.036        |
| 8  | Breeding stage + Stressor type + Sex + Sex*Stressor type + Breeding stage *Stressor type                      | Colony area, stressor order | 13       | -469.328           | 966.3        | 4.59        | 0.029        |
| 9  | Breeding stage + Stressor type + Sex + Sex*Stressor type + Sex*Breeding stage                                 | Colony area, stressor order | 12       | -470.832           | 967.0        | 5.27        | 0.021        |
| 10 | Breeding stage + Stressor type + Sex + Sex*Breeding stage + Sex*Stressor type + Breeding stage *Stressor type | Colony area, stressor order | 14       | -469.327           | 968.5        | 6.73        | 0.010        |

The 10 best models retained by AICc selection are presented. Independent variables include stressor type (sounds, 10-m approaches and captures), breeding shift number, sex, and interactions between those variables. Colony area and stressor order were entered as a covariates in all models to control for area related differences in stress responses (see Viblanc et al. 2012) and potential habituation/sensitization effects. Bird ID was included as a random factor in all models to account for repeated measures on individual birds. ΔAICc is the difference in AIC compared to the best model (given in bold). The AIC weight is given by wi and represents the probability that a given model is the best among the models presented. The best model is selected based on lowest AICc. When 2 models had ΔAICc < 2, the model with the highest wi was selected.

**Table S3. Model selection based on Akaike’s Information Criterion corrected for small sample sizes (AICc) to explain variability in breeding king penguin detection distances (based on heart rate increase, see Methods) of an approaching experimenter during an acute capture stress.**

| N° | Model terms                               | Covariates                  | df       | Loglikelihood   | AICc         | $\Delta$ AICc | wi           |
|----|-------------------------------------------|-----------------------------|----------|-----------------|--------------|---------------|--------------|
| 1  | <b>Breeding shift</b>                     | Colony area, stressor order | <b>6</b> | <b>-306.401</b> | <b>625.9</b> | <b>0.00</b>   | <b>0.366</b> |
| 2  | Intercept only                            | Colony area, stressor order | 5        | -307.686        | 626.2        | 0.24          | 0.324        |
| 2  | Breeding shift + Sex                      | Colony area, stressor order | 7        | -306.401        | 628.3        | 2.39          | 0.111        |
| 3  | Sex                                       | Colony area, stressor order | 6        | -307.610        | 628.3        | 2.42          | 0.109        |
| 4  | Breeding shift + Sex + Sex*Breeding shift | Colony area, stressor order | 8        | -305.394        | 628.7        | 2.83          | 0.089        |

Independent variables include bird sex, breeding shift number, and the interaction between those variables. Colony area and stressor order were entered as a covariates in all models to control for area related differences in stress responses (see Viblanc et al. 2012) and potential habituation/sensitization effects. Bird ID was included as a random factor in all models to account for repeated measures on individual birds.  $\Delta$ AICc is the difference in AIC compared to the best model (given in bold). The AIC weight is given by wi and represents the probability that a given model is the best among the models presented. The best model is selected based on lowest AICc. When 2 models had  $\Delta$ AICc < 2, the model with the highest wi was selected.

**Table S4. Model selection based on Akaike's Information Criterion corrected for small sample sizes (AICc) to explain variability in breeding king penguin detection distances (based on heart rate increase, see Methods) of an approaching experimenter during an acute capture stress.**

| N° | Model terms                               | Covariates                  | df       | Loglikelihood   | AICc         | $\Delta$ AICc | wi           |
|----|-------------------------------------------|-----------------------------|----------|-----------------|--------------|---------------|--------------|
| 1  | <b>Intercept only</b>                     | Colony area, stressor order | <b>5</b> | <b>-307.686</b> | <b>626.2</b> | <b>0.00</b>   | <b>0.396</b> |
| 2  | Breeding stage                            | Colony area, stressor order | 6        | -306.868        | 626.8        | 0.69          | 0.280        |
| 2  | Sex                                       | Colony area, stressor order | 6        | -307.610        | 628.3        | 2.17          | 0.133        |
| 3  | Breeding stage + Sex + Sex*Breeding stage | Colony area, stressor order | 8        | -305.428        | 628.8        | 2.65          | 0.105        |
| 4  | Breeding stage + Sex                      | Colony area, stressor order | 7        | -306.862        | 629.2        | 3.07          | 0.085        |

Independent variables include bird sex, breeding stage (incubation vs. chick brooding), and the interaction between those variables. Colony area and stressor order were entered as a covariates in all models to control for area related differences in stress responses (see Viblanc et al. 2012) and potential habituation/sensitization effects. Bird ID was included as a random factor in all models to account for repeated measures on individual birds.  $\Delta$ AICc is the difference in AIC compared to the best model (given in bold). The AIC weight is given by wi and represents the probability that a given model is the best among the models presented. The best model is selected based on lowest AICc. When 2 models had  $\Delta$ AICc < 2, the model with the highest wi was selected.

**Table S5. Model selection based on Akaike's Information Criterion corrected for small sample sizes (AICc) to heart rate excess variability in response to acute stressors in breeding king penguin males during their first incubation shift either early or late in the season.**

| N°       | Model terms                                                     | Covariate             | df       | Loglikelihood   | AICc         | ΔAICc       | wi           |
|----------|-----------------------------------------------------------------|-----------------------|----------|-----------------|--------------|-------------|--------------|
| <b>1</b> | <b>Stressor type</b>                                            | <b>Stressor order</b> | <b>5</b> | <b>-118.614</b> | <b>248.4</b> | <b>0.00</b> | <b>0.529</b> |
| 2        | Stressor type + Breeding timing                                 | Stressor order        | 6        | -117.726        | 249.1        | 0.73        | 0.368        |
| 3        | Stressor type + Breeding timing + Stressor type*Breeding timing | Stressor order        | 7        | -117.697        | 251.7        | 3.27        | 0.103        |
| 4        | Intercept only                                                  | Stressor order        | 4        | -168.564        | 345.9        | 97.49       | 0.000        |
| 5        | Breeding timing                                                 | Stressor order        | 5        | -168.162        | 347.5        | 99.10       | 0.000        |

Independent variables include breeding timing (early vs. late in the season), stressor type, and the interaction between those variables. Stressor order was entered as a covariate in all models to control for potential habituation/sensitization effects. Early and late males were stressed in the same colony area. Bird ID was included as a random factor in all models to account for repeated measures on individual birds. ΔAICc is the difference in AIC compared to the best model (given in bold). The AIC weight is given by wi and represents the probability that a given model is the best among the models presented. The best model is selected based on lowest AICc. When 2 models had ΔAICc < 2, the model with the highest wi was selected.
